# Supplementary material for: Computational Modeling of a Transcriptional Switch Underlying B-Lymphocyte Lineage Commitment of Hematopoietic Multipotent Cells
Source: PubMed Central journal article supplement (PMC4500571; doi:10.1371/journal.pone.0132208), 2015-07-13
Supplement: pone.0132208.s016.pdf [file pone.0132208.s016.pdf]

**Table S2. Parameter sensitivity coefficients for bistability.**

| Param    | Min value | Max value | Sensitivity, FC* | Factor regulated                  |
|----------|-----------|-----------|------------------|-----------------------------------|
| $a_0$    | < 0       | 0.341     | -inf; 8.414      | param. controlling EBF1 dynamics  |
| $a_2$    | 0.044     | 0.4691    | -2.319; 1.092    |                                   |
| $a_3$    | < 0       | 0.077     | -inf; 3.459      |                                   |
| $a_4$    | 0.595     | 1.461     | -0.597; 0.699    |                                   |
| $a_5$    | < 0       | 0.183     | -inf; 3.056      |                                   |
| $a_6$    | < 0       | 0.115     | -inf; 1.988      |                                   |
| $a_7$    | < 0       | 6.868     | -inf; 10.424     |                                   |
| $a_8$    | < 0       | 1.134     | -inf; 12.332     |                                   |
| $a_{10}$ | < 0       | 0.748     | -inf; 2.470      |                                   |
| $a_{11}$ | 0.088     | 0.690     | -inf; 2.013      |                                   |
| $a_{12}$ | < 0       | 0.280     | -inf; 4.375      |                                   |
| $b_0$    | < 0       | 0.011     | -inf; 3.459      |                                   |
| $b_2$    | 0.224     | 0.330     | -0.373; 0.186    |                                   |
| $b_3$    | 0.381     | 1.165     | -0.878; 0.735    |                                   |
| $b_4$    | 0.016     | 0.177     | -0.524; 2.944    |                                   |
| $e_0$    | < 0       | 19.380    | -inf; 14.242     | param. controlling FLT3 dynamics  |
| $f_0$    | < 0       | 0.502     | -inf; 8.972      | param. controlling IL-7R dynamics |
| $f_1$    | < 0       | 0.715     | -inf; 2.253      |                                   |
| $f_2$    | < 0       | 22.380    | -inf; 6.373      |                                   |
| $f_3$    | < 0       | 9.267     | -inf; 7.069      |                                   |
| $j_0$    | < 0       | 0.204     | -inf; 7.672      | param. controlling E2A dynamics   |
| $j_1$    | 0.024     | 0.471     | -0.807; 3.487    |                                   |

\* The parameter sensitivity for bistability is defined as the log2 fold change of the ratio between the max (min) parameter value for which the system is bistable and the parameter used in the model (S1 Table).
